# Supplementary material
Source: MDPI journal article supplement (https://www.mdpi.com/2073-4395/10/7/1013)
Supplement: s1 [file s1]

Archive with 10 entries (10 files):
- Figure S1.pdf
- Figure S2.pdf
- Figure S3.pdf
- Figure S4.pdf
- Figure S5.pdf
- Supp Figure and Table Captions.docx
- Table S1.xlsx
- Table S2.xlsx
- Table S3.xlsx
- Table S4.xlsx
