# Supplementary material
Source: MDPI journal article supplement (https://www.mdpi.com/2073-4395/10/7/1013)

**A**

Expectation-deviation Tolerance

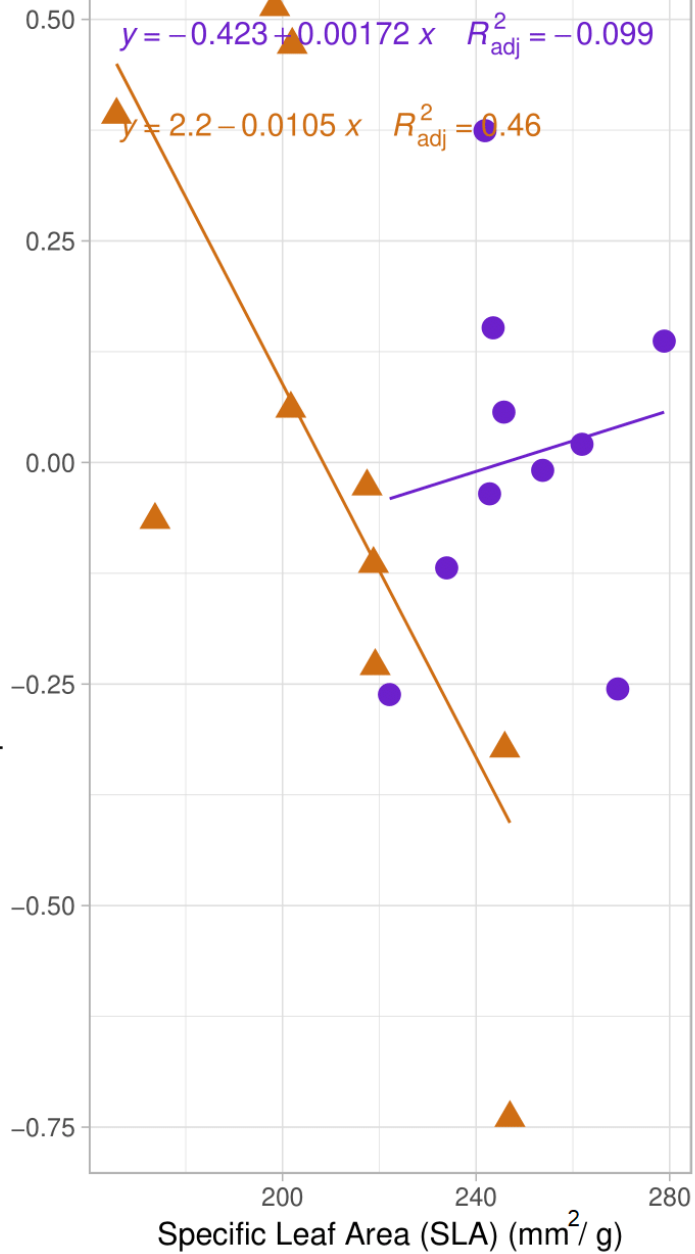**B**

Expectation-deviation Tolerance

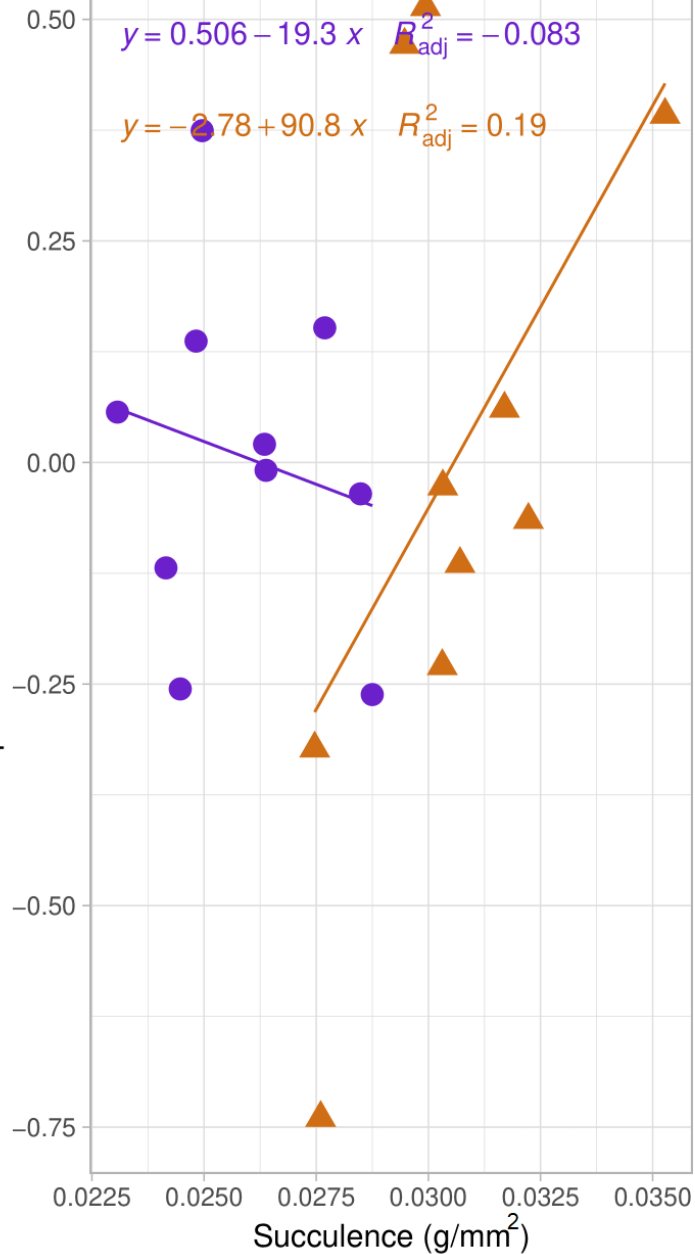**C**

Expectation-deviation Tolerance

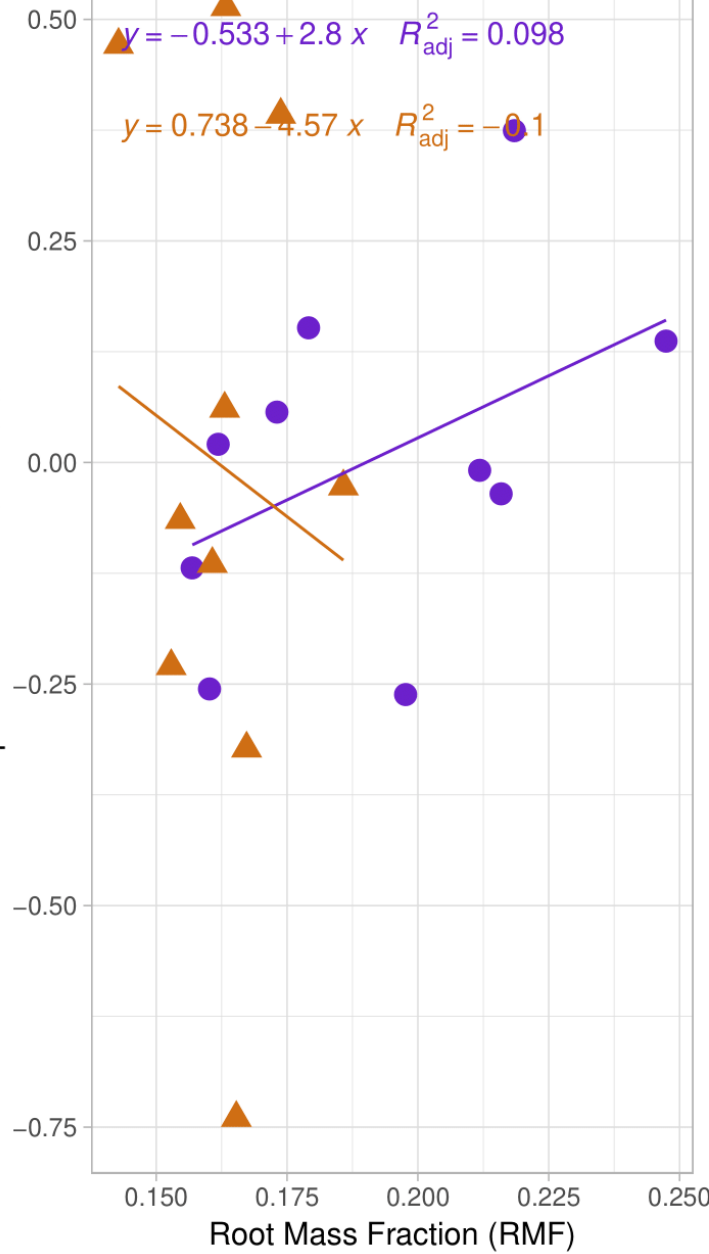

Supplement: s1 [file s1 › Figure S3.pdf]
