# Supplementary material
Source: MDPI journal article supplement (https://www.mdpi.com/2073-4395/10/7/1013)

## Boron

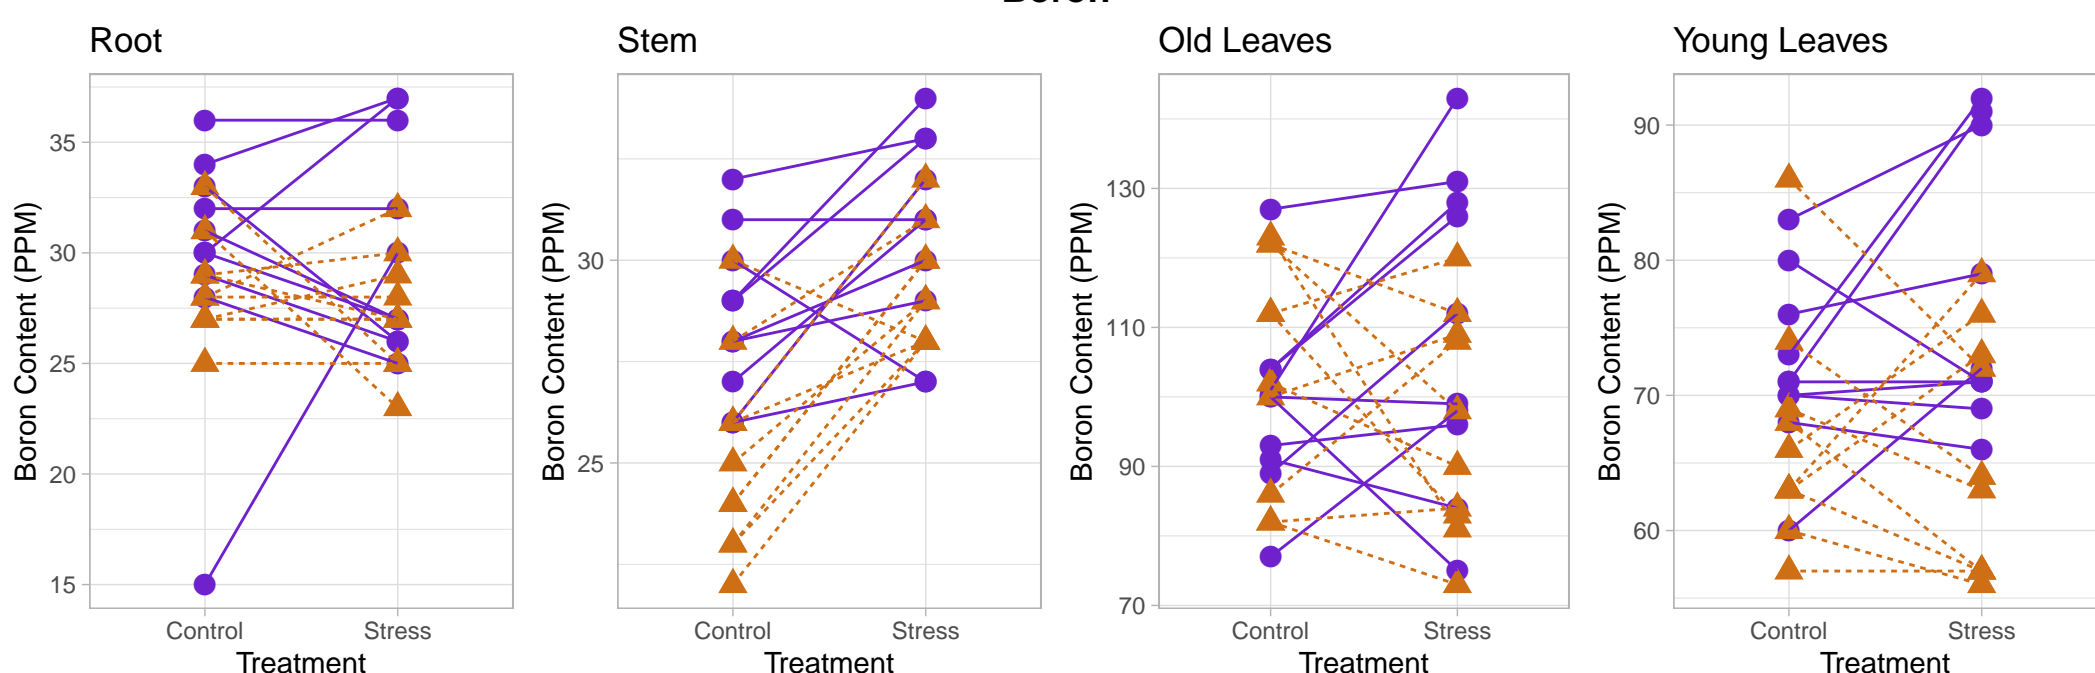

## Calcium

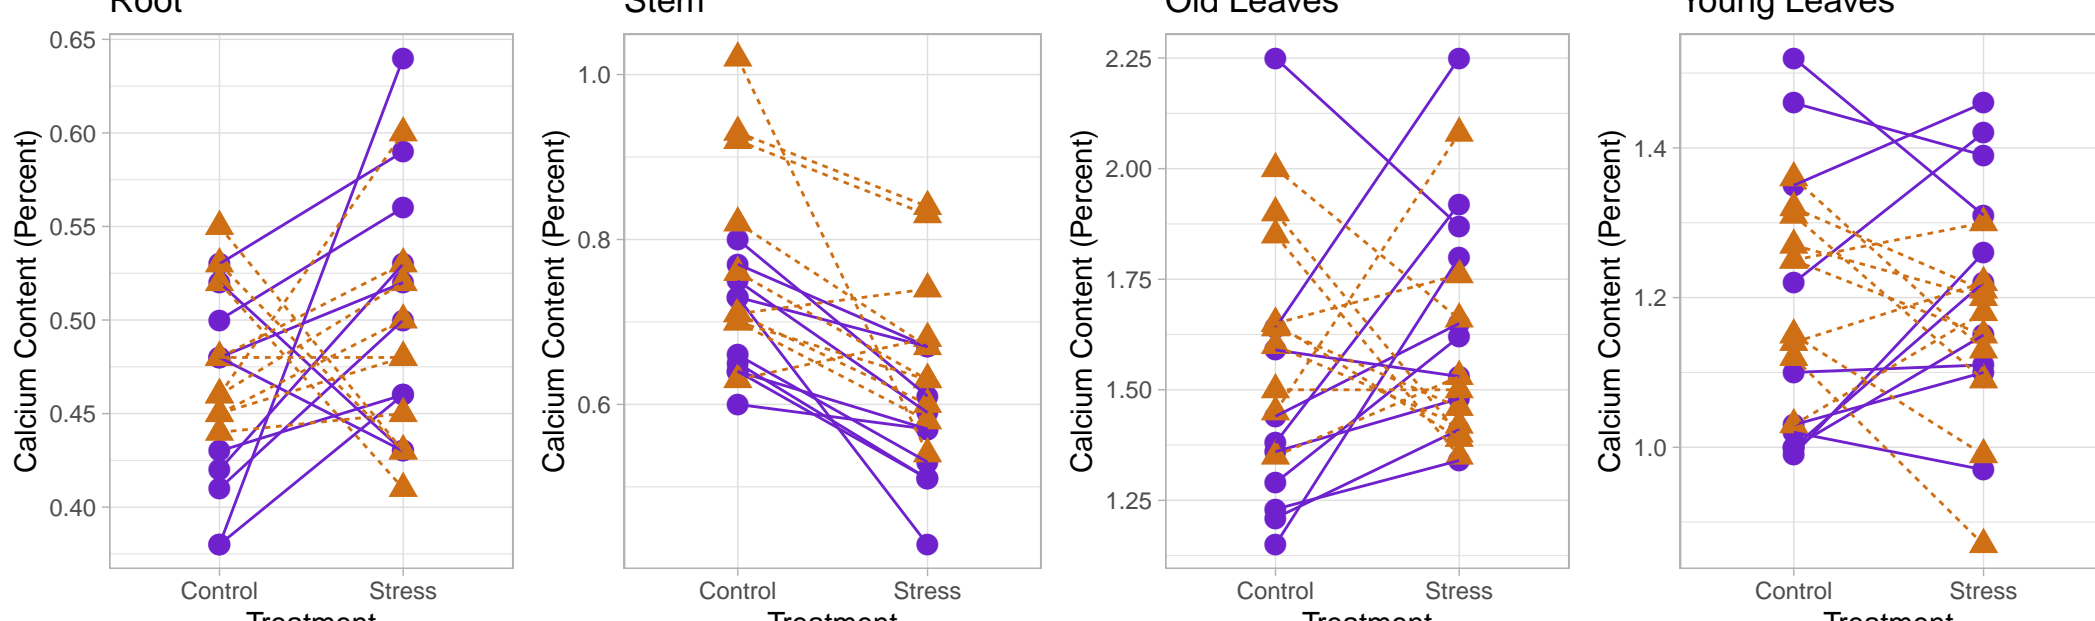

## Copper

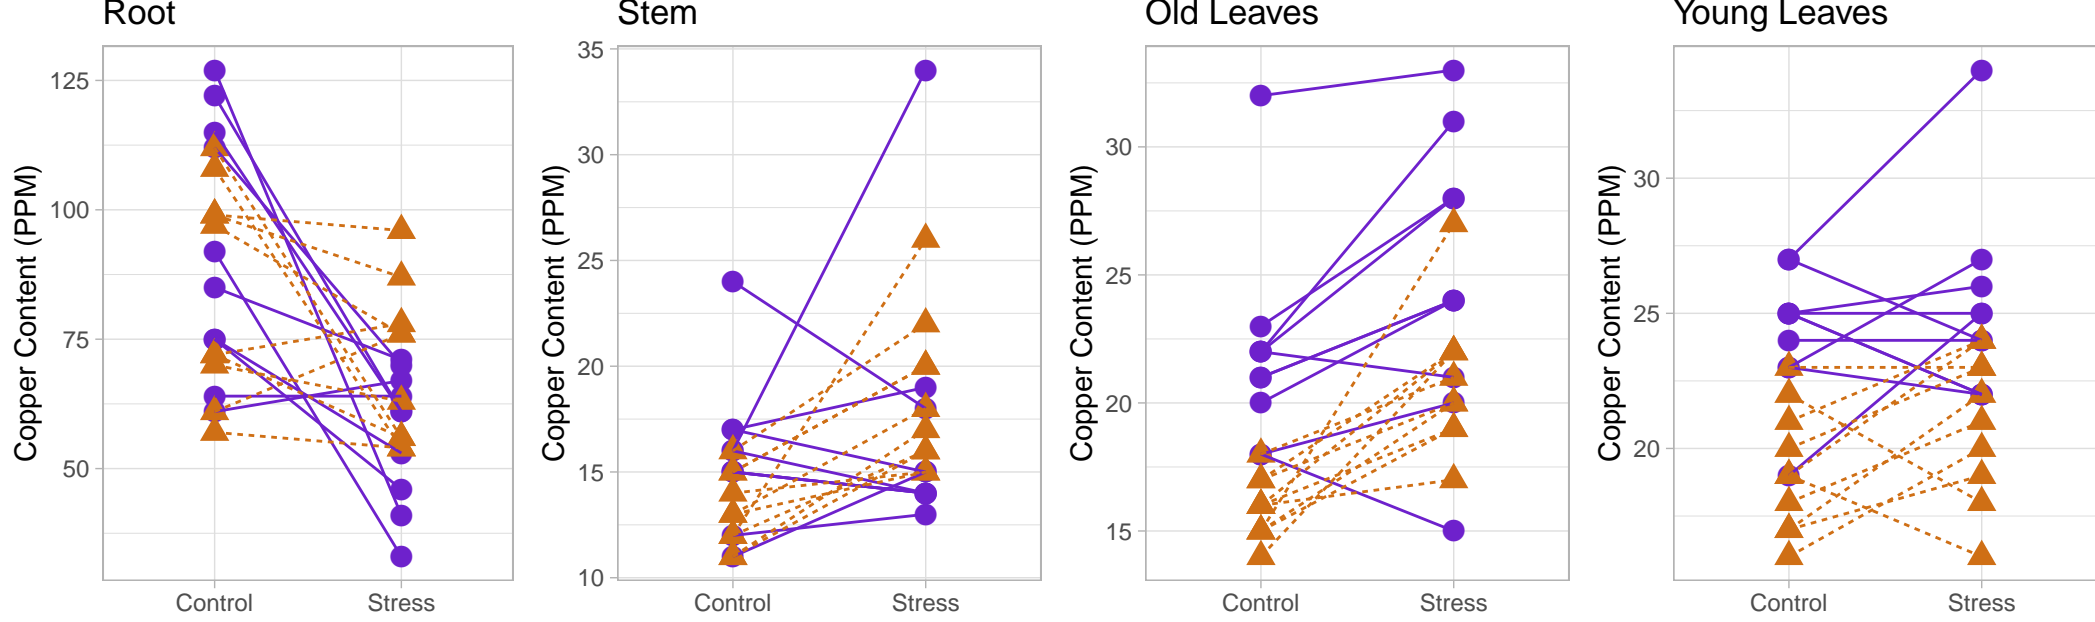

## Iron

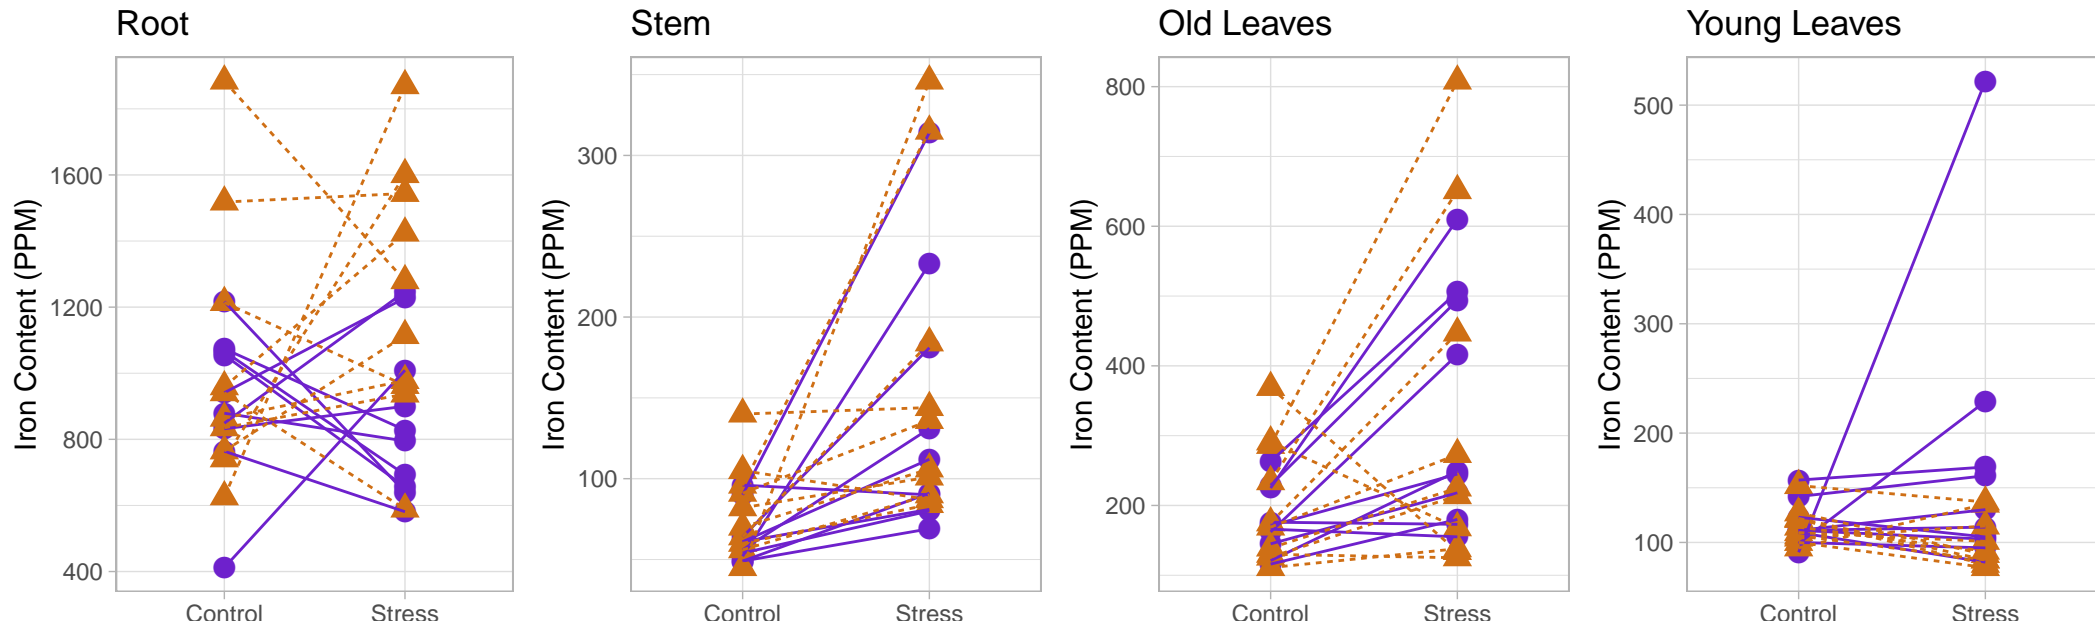

## Magnesium

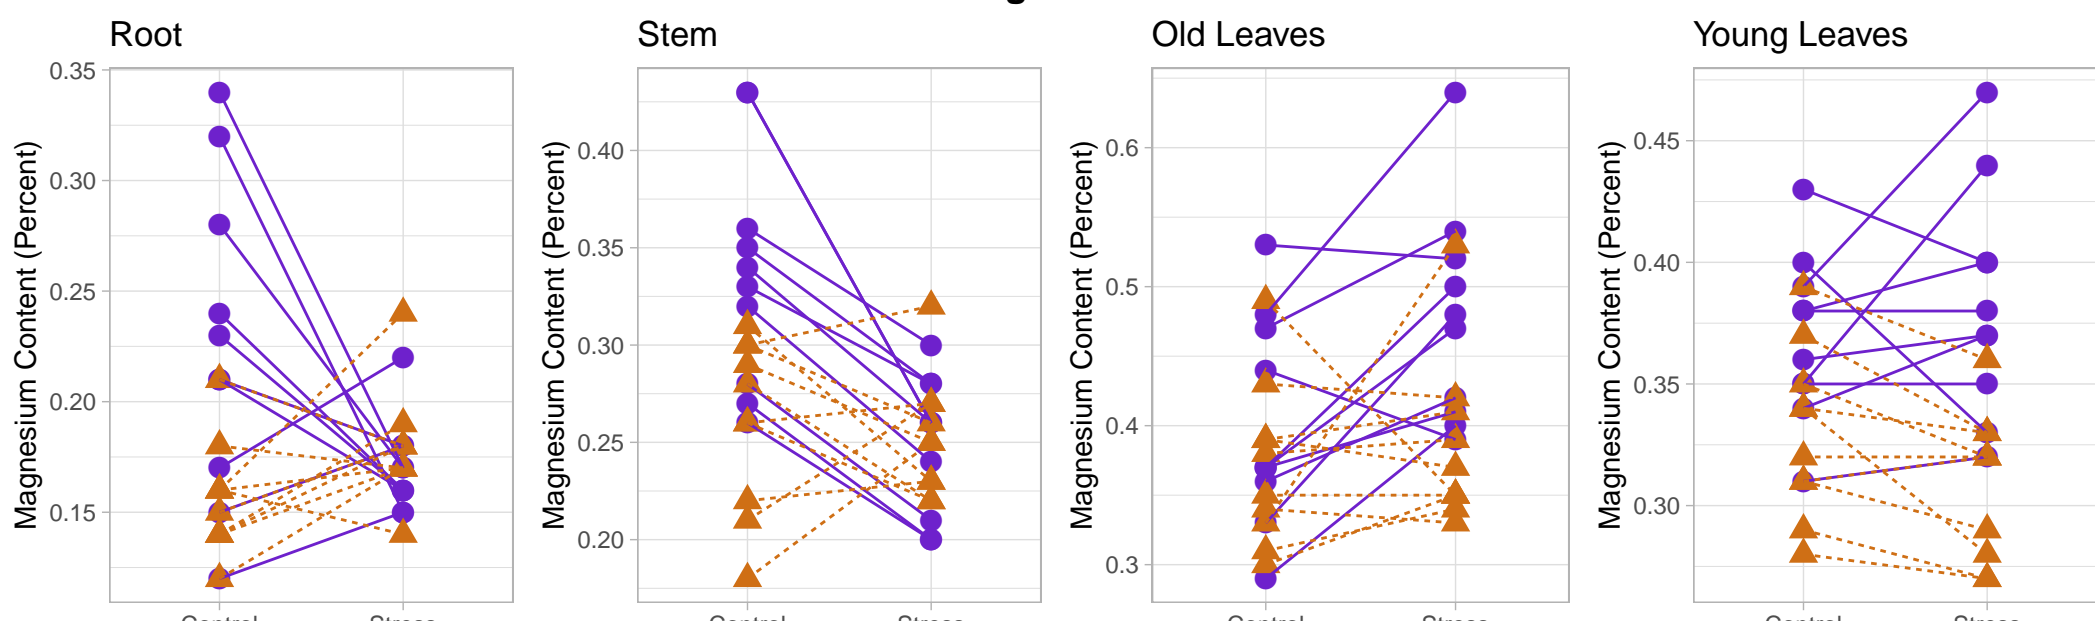

## Manganese

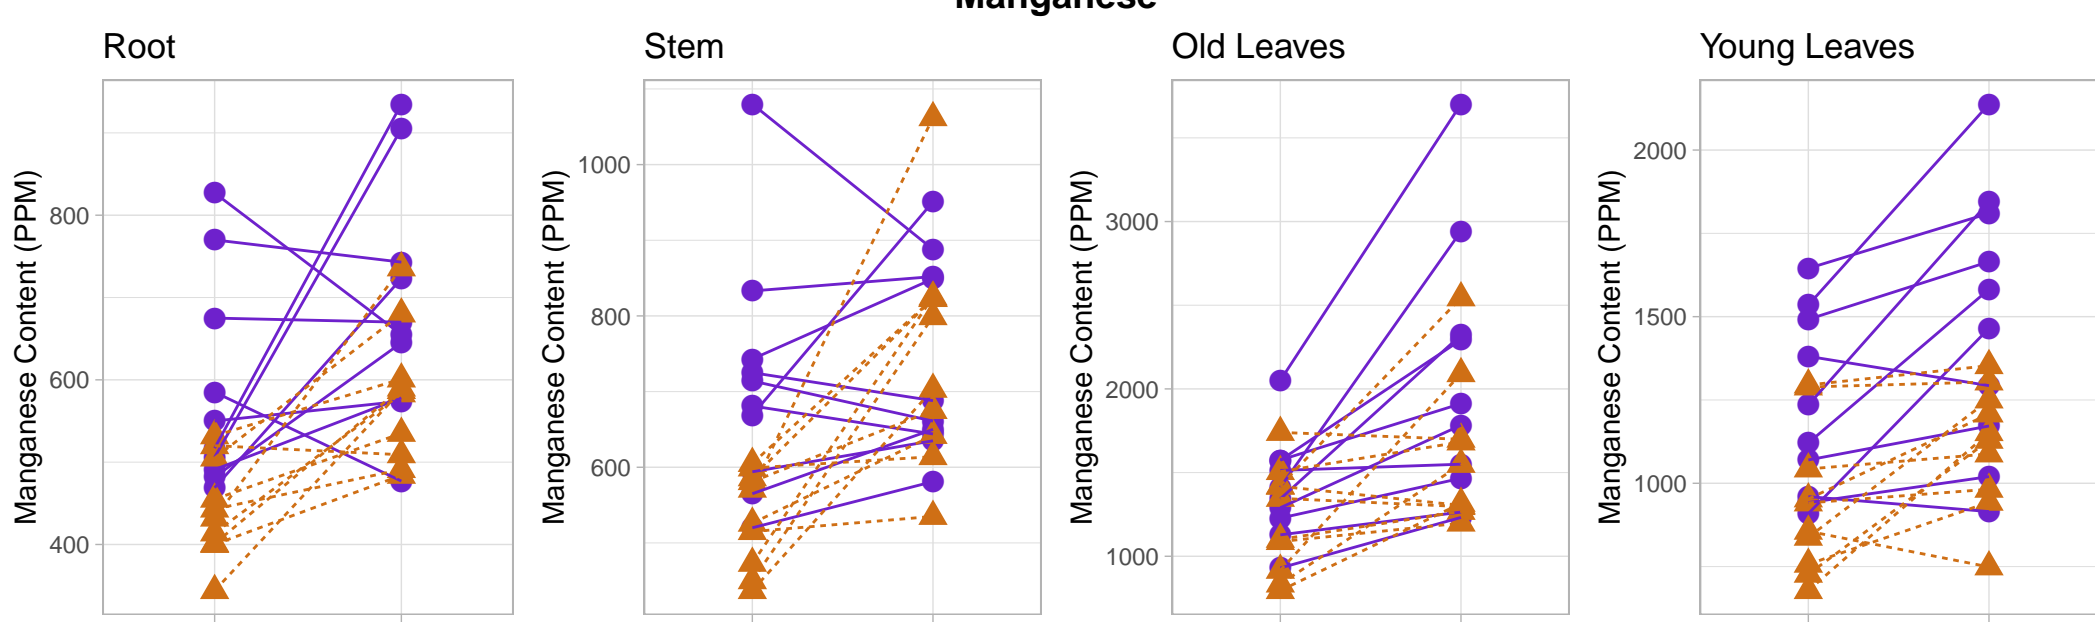

## Nitrogen

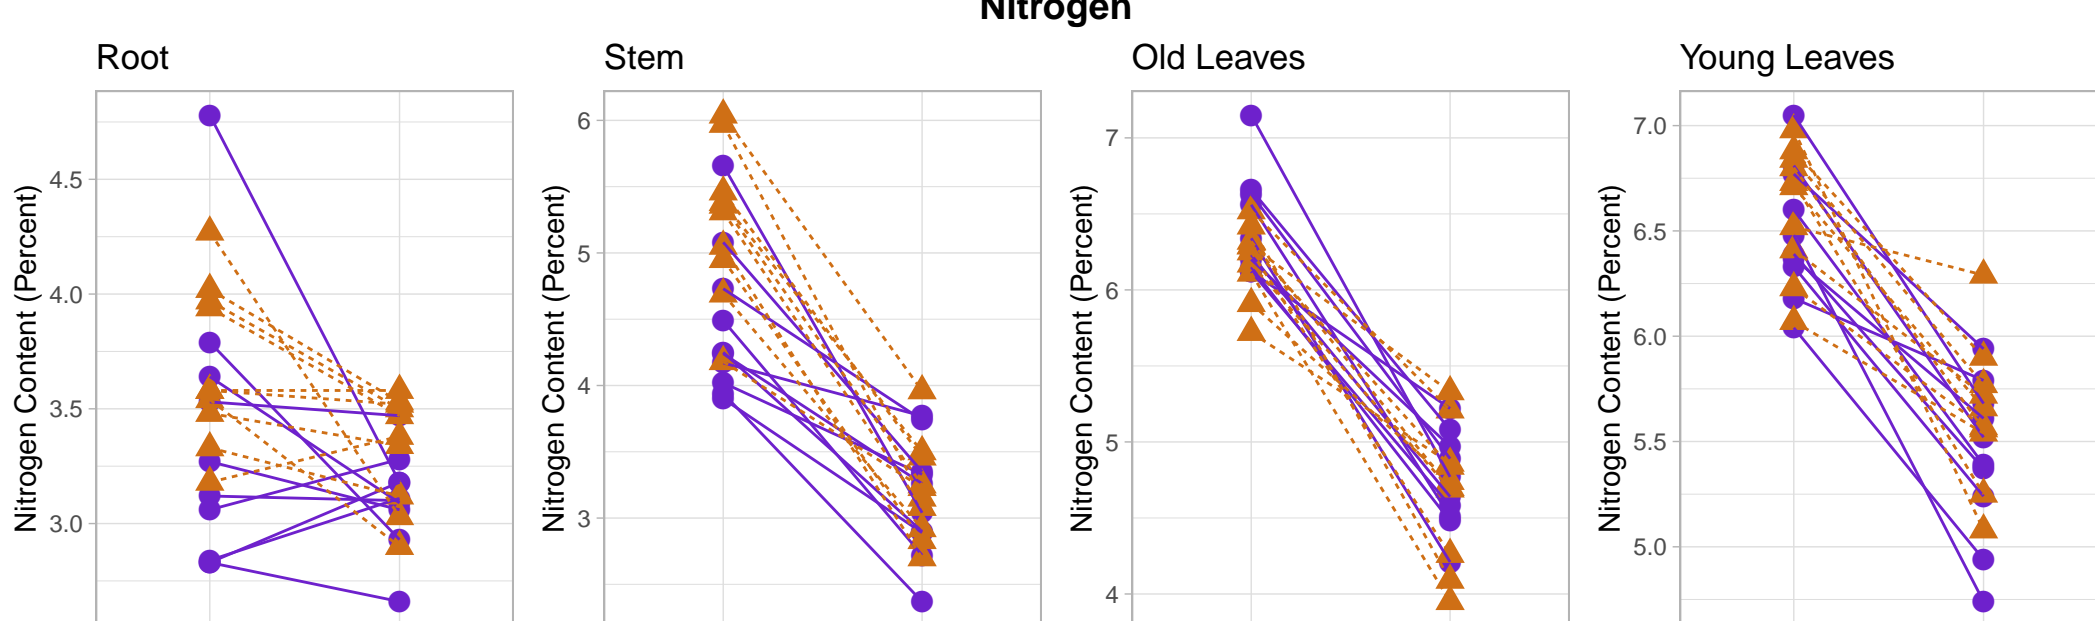

## Phosphorus

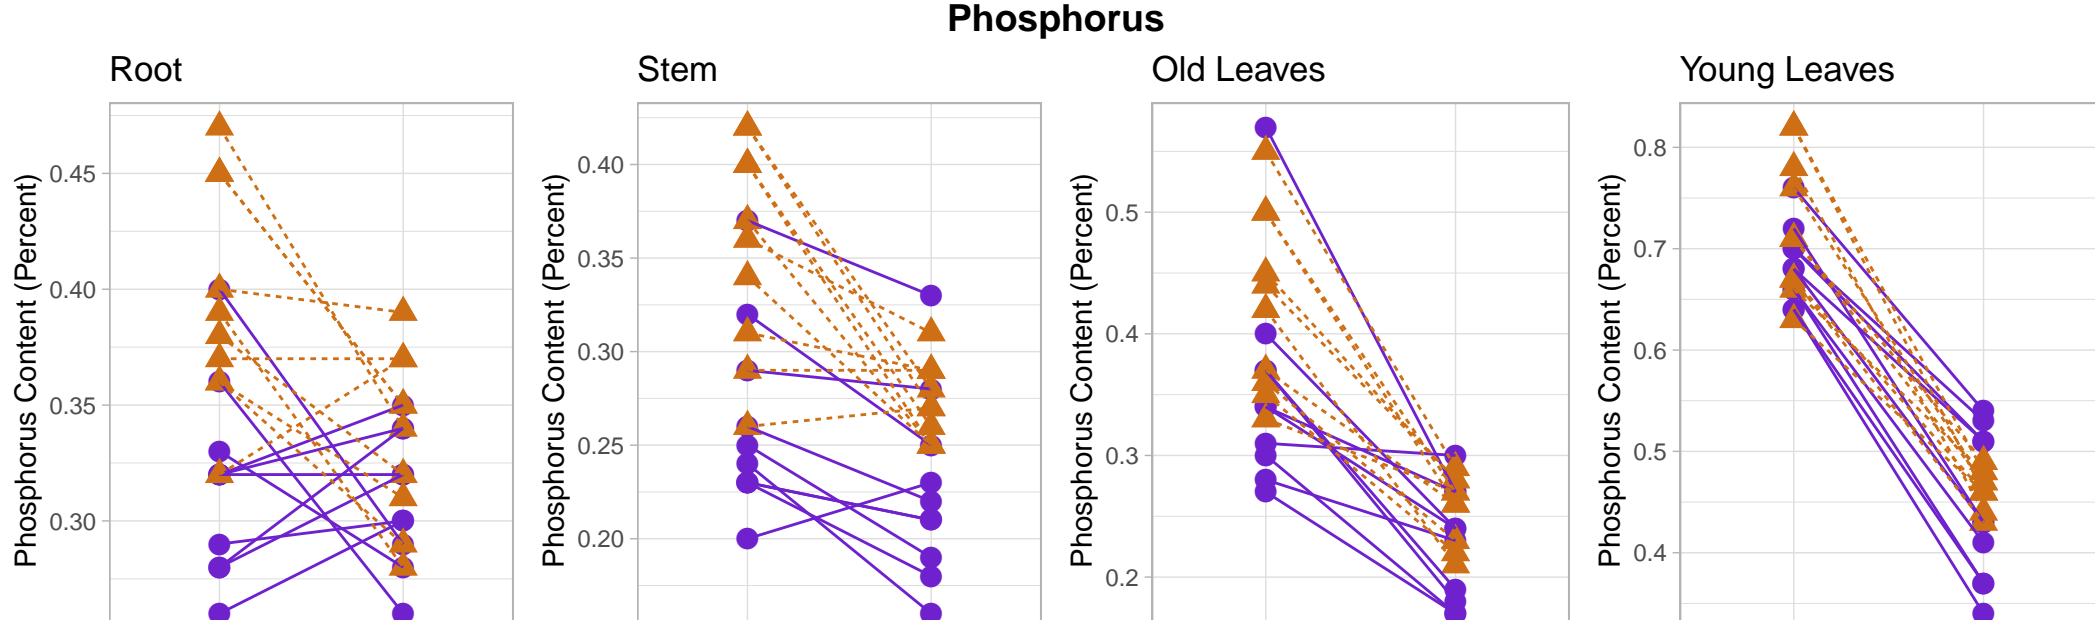

## Potassium

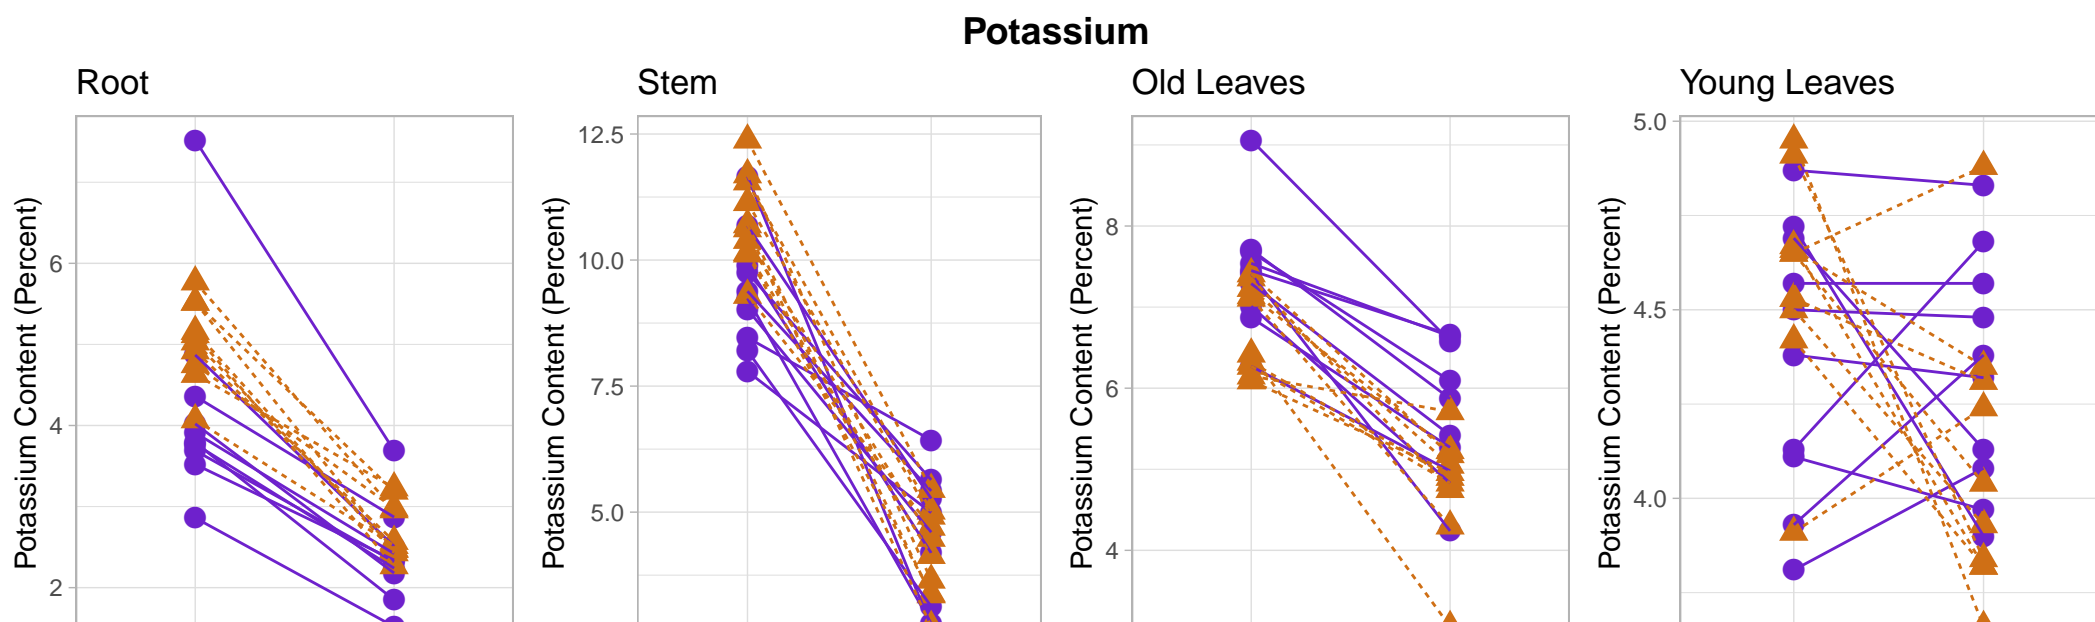

## Sodium

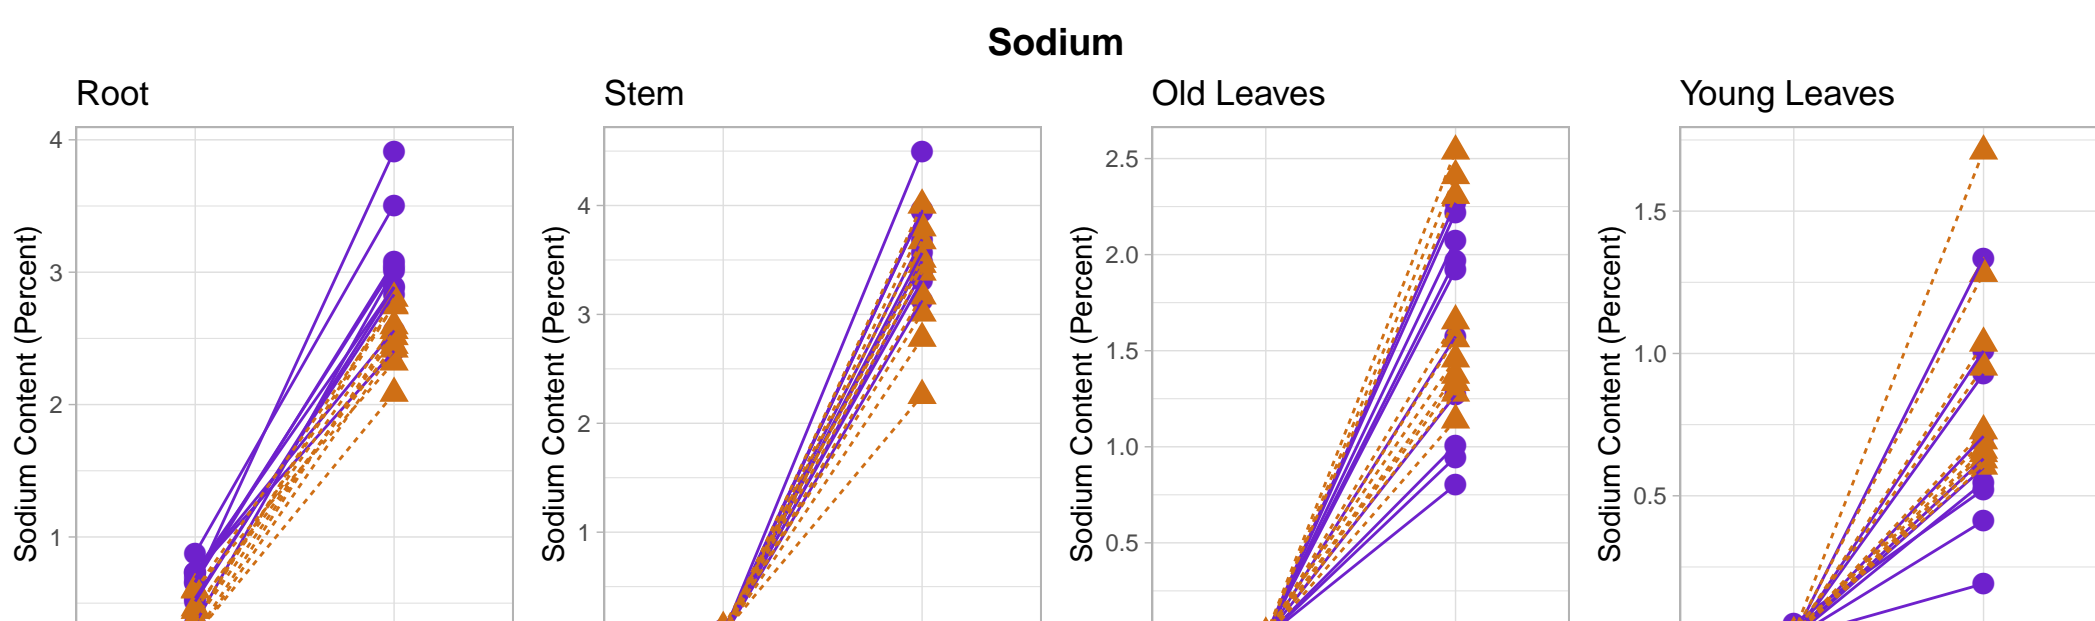

## Sulfur

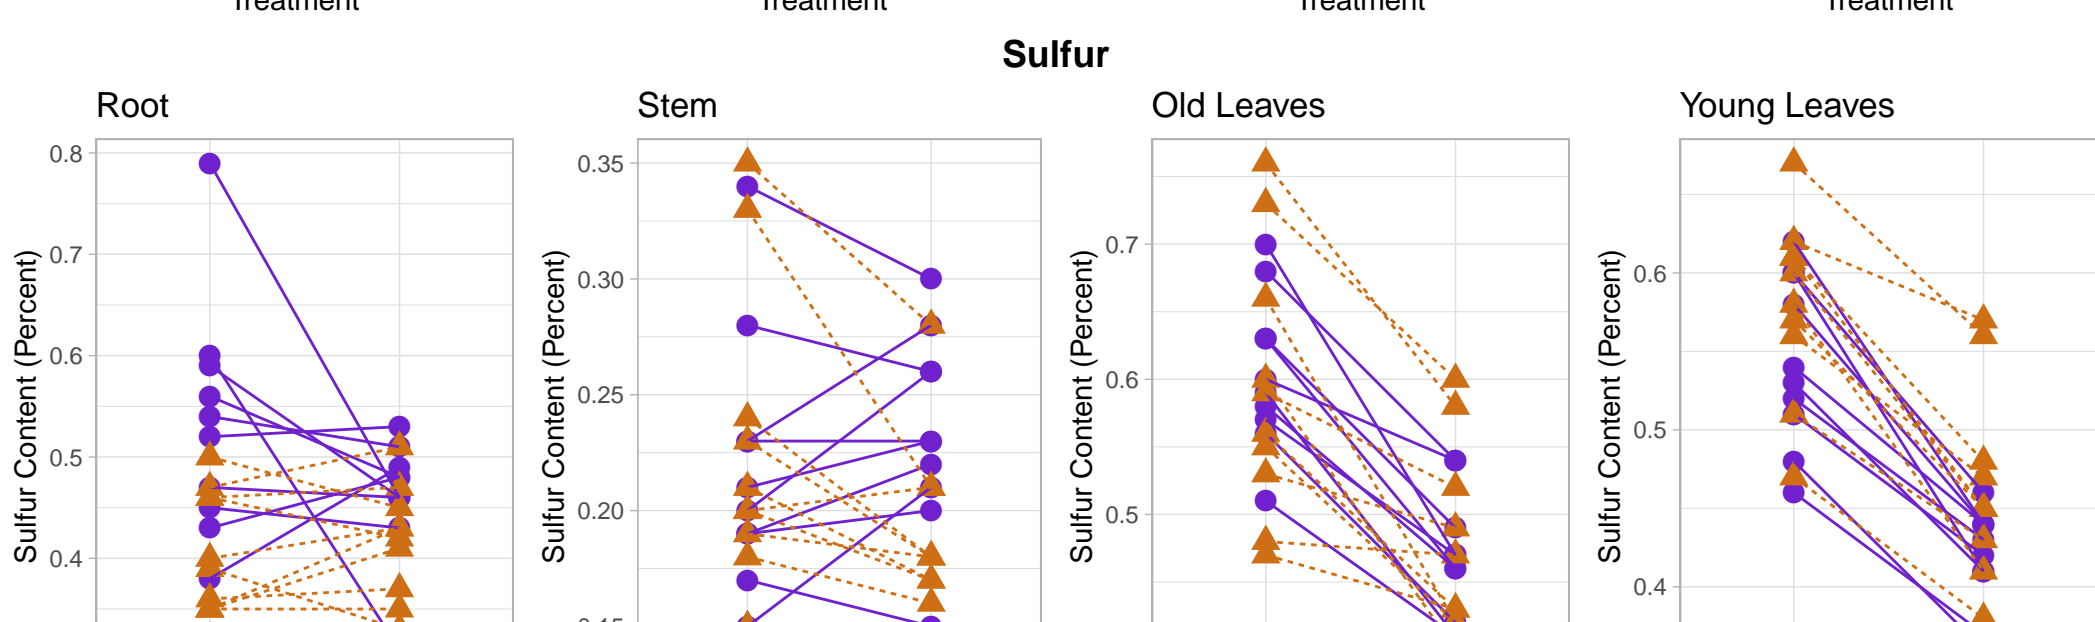

## Zinc

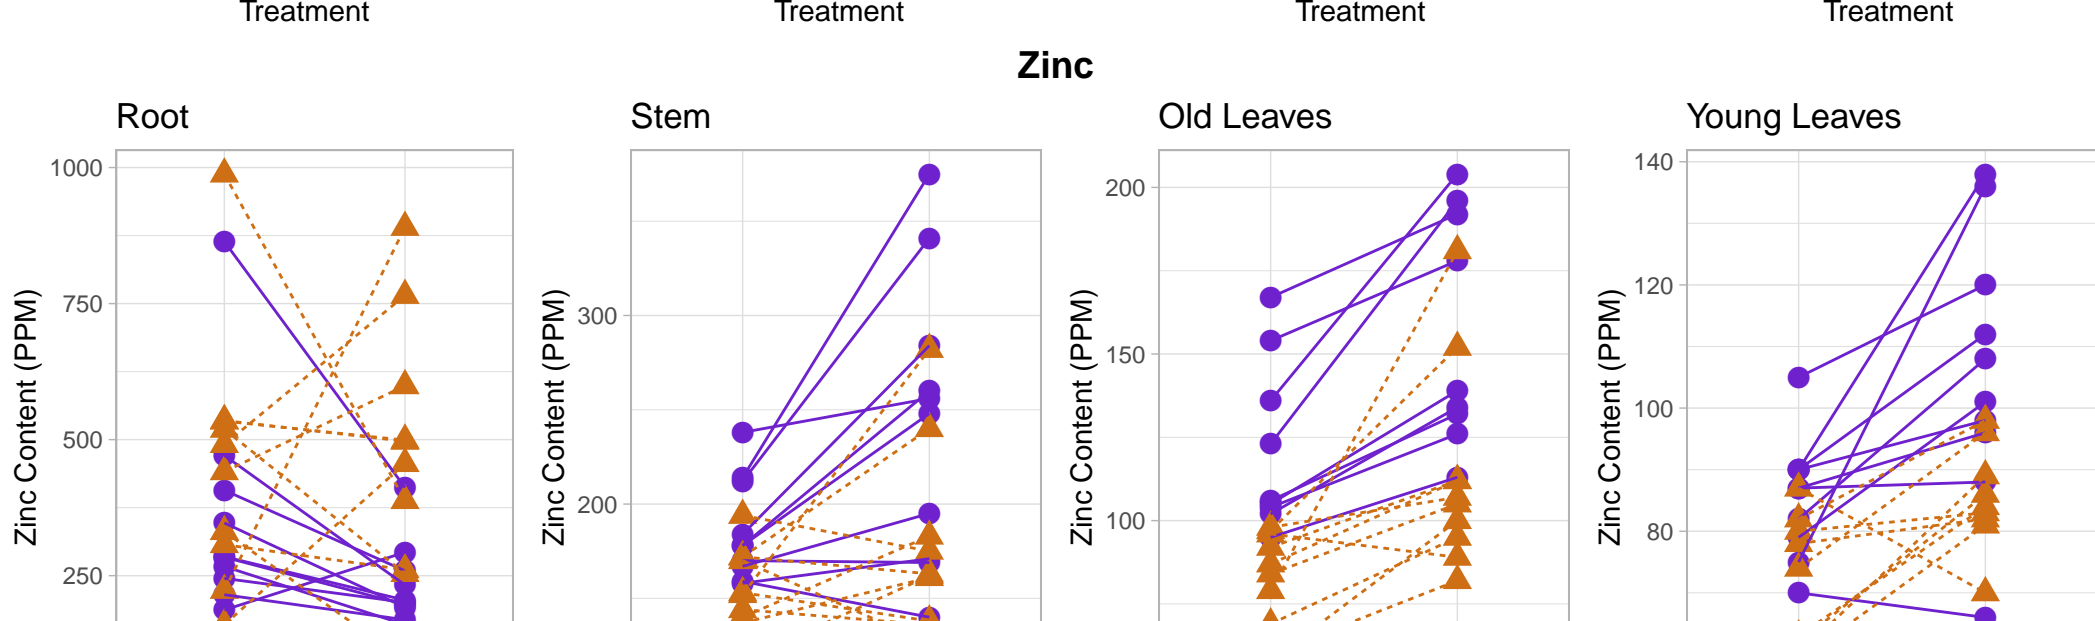

Supplement: s1 [file s1 › Figure S4.pdf]
