# Supplementary material
Source: MDPI journal article supplement (https://www.mdpi.com/2073-4395/10/7/1013)
Supplement: s1 [file s1 › Supp Figure and Table Captions.docx]

**Figure S1.** Multivariate view of elemental content by tissue type. First and second principal components of elemental content per tissue under stress treatment and of the difference between control and stress (delta). Purple circles indicate cultivated accessions and orange triangles indicate wild accessions.

**Figure S2.** Multivariate view of mass relative allocated amount (MRAA) by tissue type. MRAA shows the difference between the proportion of element allocated to a tissue and the proportion of mass allocated to that tissue. First and second principal components of MRAA per tissue under stress treatment and of the difference between control and stress (delta). Purple circles indicate cultivated accessions and orange triangles indicate wild accessions.

**Figure S3.** Association of expectation-deviation tolerance and the top three driving traits of the first principal component under stress from Figure 3B, e.g. a further breakdown of Figure 5A, showing (A) Specific leaf area (SLA), (B) Leaf succulence on a per area basis of a most recently fully expanded leaf (MRFEL)), and (C) Root mass fraction (RMF) (calculated by root mass/total biomass). Purple circles indicate cultivated accessions and orange triangles indicate wild accessions

**Figure S4.** Tissue type specific reaction norms of elemental content between control and stress (150 mM NaCl). Set of figures (one per element) displaying tissue type (Root, Stem, Old Leaves, Young Leaves from left to right) reaction norms of elemental content. Purple circles indicate cultivated accessions and orange triangles indicate wild accessions.

**Figure S5.** Tissue type specific reaction norms of mass relative allocated amount (MRAA) between control and stress (150 mM NaCl). MRAA shows the difference between the proportion of element allocated to a tissue and the proportion of mass allocated to that tissue. Set of figures (one per element) displaying tissue type (Root, Stem, Old Leaves, Young Leaves from left to right) reaction norms of MRAA. Purple circles indicate cultivated accessions and orange triangles indicate wild accessions.

**Table S1.** List of accessions used with USDA GRIN Plant ID. Wild accessions marked with an asterisk (*) were collected from populations in the Little Sahara Sand Dunes and the Konza Prairie Biological Station. Cultivated accessions are inbred lines from a sunflower association mapping population (Mandel et al. 2011).

**Table S2.** Contributions of loadings from the first and second principal components of elemental content and mass relative allocated amount (MRAA) shown in Figure 2. MRAA shows the difference between the proportion of element allocated to a tissue and the proportion of mass allocated to that tissue.

**Table S3.** Regression between the proportional reduction tolerance and expectation-deviation-tolerance and elemental content or mass relative allocated amount (MRAA) by tissue type for the stress treatment and the Delta (difference between control and stress treatment). MRAA shows the difference between the proportion of element allocated to a tissue and the proportion of mass allocated to that tissue.

**Table S4.** Mean Elemental content and mass relative allocated amount (MRAA) of elements and p-value significance of Wald’s Chi-square Test on Treatment, Domestication status, and their Interaction. MRAA shows the difference between the proportion of element allocated to a tissue and the proportion of mass allocated to that tissue.
