# Supplementary material
Source: MDPI journal article supplement (https://www.mdpi.com/2073-4395/10/7/1013)
Supplement: s1 [file s1 › Table S1.xlsx]

## Sheet: Sheet1
Accession	Domestication Status	Location
PI 597368	Cultivated
PI 597373	Cultivated
PI 599783	Cultivated
PI 476853	Cultivated
PI 599778	Cultivated
PI 599785	Cultivated
PI 603989	Cultivated
PI 561919	Cultivated
PI 664202	Cultivated
PI 664225	Cultivated
Little Sahara*	Wild	Utah
PI 531016	Wild	Washington
Konza*	Wild	Kansas
PI 613727	Wild	Arkansas
PI 597895	Wild	Iowa
PI 586822	Wild	Wyoming
PI 413101	Wild	California
Ames 14400	Wild	Arizona
Ames 33213	Wild	Texas
PI 613745	Wild	Minnesota
