# Supplementary material
Source: MDPI journal article supplement (https://www.mdpi.com/2073-4395/10/7/1013)
Supplement: s1 [file s1 › Table S2.xlsx]

## Sheet: Table S1
Element	Trait	PC1 Contribution - Control	PC2 Contribution - Control	PC1 Contribution - Stress	PC2 Contribution - Stress	PC1 Contribution - Delta	PC2 Contribution - Delta
B	Elemental Content	9.81524	5.62813	12.5655	0.41489	0.384888	0.570759
Ca	Elemental Content	12.4991	1.47899	13.9023	0.351654	12.0813	1.48324
Cu	Elemental Content	9.65518	10.8063	5.55821	20.3597	1.09486	14.9259
Fe	Elemental Content	8.90087	9.68997	5.71586	15.1978	0.400128	13.9534
K	Elemental Content	0.174948	29.3928	7.88722	8.20678	15.7691	14.8579
Mg	Elemental Content	10.3529	0.074888	13.1702	0.164985	14.3872	8.08989
Mn	Elemental Content	9.59186	4.17862	11.036	0.429365	14.6392	9.63633
N	Elemental Content	12.9657	0.110014	11.4631	4.50964	0.0154849	15.9692
Na	Elemental Content	10.9635	5.5798	9.20075	10.0375	22.6327	6.99354
P	Elemental Content	3.63869	6.27798	0.442778	14.5674	10.6764	0.473135
S	Elemental Content	2.47998	25.5743	2.46508	23.2134	7.36389	5.24602
Zn	Elemental Content	8.96201	1.20817	6.59289	2.54691	0.554891	7.80069
B	MRAA	9.73967	4.61327	12.5344	0.972636	0.214251	0.391033
Ca	MRAA	12.6301	0.0411357	13.2618	0.107945	0.209861	34.1361
Cu	MRAA	7.00216	14.7276	4.66818	21.6171	15.1491	2.24329
Fe	MRAA	5.36385	15.9499	4.72382	11.5704	5.55878	2.33279
K	MRAA	0.107427	27.8642	8.04068	10.7343	4.50225	8.99744
Mg	MRAA	10.8491	0.745239	12.3464	1.01633	5.46922	18.839
Mn	MRAA	11.3093	1.49868	12.2191	0.1659	2.68833	19.5236
N	MRAA	12.355	0.0434181	11.7254	4.07225	8.23939	11.4421
Na	MRAA	12.3126	0.0163609	8.50216	8.02173	25.0165	1.4836
P	MRAA	4.36159	10.1942	0.497588	16.3975	16.678	0.00553971
S	MRAA	2.22721	24.292	1.86017	25.2698	4.12837	0.106718
Zn	MRAA	11.742	0.0139691	9.62025	0.0541363	12.1459	0.498763
