# Supplementary material
Source: MDPI journal article supplement (https://www.mdpi.com/2073-4395/10/7/1013)
Supplement: s1 [file s1 › Table S3.xlsx]

## Sheet: Sheet1
				Proportional-reduction tolerance			Expectation-deviation tolerance
Trait Type	Response to	Tissue	Trait	Trait Effect	Domestication Effect	Interaction	Trait Effect	Domestication Effect	Interaction
Elemental PCA	Delta	Root	PC1 Axis	0.0107832	0.0229584	0.59529	0.0827656	0.802062	0.219283
Elemental PCA	Delta	Root	PC2 Axis	0.128239	0.298155	0.261384	0.695178	0.871147	0.244894
Elemental PCA	Stress	Root	PC1 Axis	0.317234	0.0341431	0.897295	0.060084	0.169286	0.722283
Elemental PCA	Stress	Root	PC2 Axis	0.0196059	0.0590631	0.470147	0.175742	0.686785	0.679329
Elemental PCA	Delta	Stem	PC1 Axis	<0.001	0.0551743	0.101532	0.107022	0.196816	0.329468
Elemental PCA	Delta	Stem	PC2 Axis	0.889544	0.0383409	0.546254	0.67549	0.879024	0.639711
Elemental PCA	Stress	Stem	PC1 Axis	0.827838	0.0298144	0.100229	0.202504	0.613538	0.328956
Elemental PCA	Stress	Stem	PC2 Axis	0.537027	0.0430169	0.139654	0.650806	0.974326	0.970148
Elemental PCA	Delta	Old Leaf	PC1 Axis	0.919212	0.0512946	0.475074	0.0151099	0.421067	0.33355
Elemental PCA	Delta	Old Leaf	PC2 Axis	0.114262	0.0380902	0.886357	0.494729	0.882791	0.495301
Elemental PCA	Stress	Old Leaf	PC1 Axis	0.609832	0.0377906	0.740722	0.123961	0.54098	0.129565
Elemental PCA	Stress	Old Leaf	PC2 Axis	0.891602	0.047738	0.696866	0.230707	0.82255	0.657499
Elemental PCA	Delta	Young Leaf	PC1 Axis	0.58739	0.0315804	0.366483	0.499363	0.856212	0.954171
Elemental PCA	Delta	Young Leaf	PC2 Axis	0.0105627	0.0838584	0.148363	0.470641	0.755284	0.103155
Elemental PCA	Stress	Young Leaf	PC1 Axis	0.72557	0.179276	0.257746	0.666611	0.804863	0.805715
Elemental PCA	Stress	Young Leaf	PC2 Axis	0.554634	0.0503042	0.85753	0.216813	0.752049	0.654085
MRAA PCA	Stress	Young Leaf	PC1 Axis	0.430891	0.279994	0.378501	0.871527	0.861369	0.163243
MRAA PCA	Stress	Young Leaf	PC2 Axis	0.129941	0.0109251	0.448121	0.0219167	0.383658	0.0731006
MRAA PCA	Delta	Young Leaf	PC1 Axis	0.151217	0.0135794	0.111563	0.852486	0.911718	0.408577
MRAA PCA	Delta	Young Leaf	PC2 Axis	<0.001	0.113941	0.567973	0.0142225	0.32187	0.101756
MRAA PCA	Stress	Old Leaf	PC1 Axis	0.72922	0.0632388	0.928422	0.0542736	0.250475	0.670285
MRAA PCA	Stress	Old Leaf	PC2 Axis	0.29937	0.0282822	0.431022	0.409862	0.963442	0.204393
MRAA PCA	Delta	Old Leaf	PC1 Axis	0.913476	0.0852133	0.701362	0.0573389	0.249306	0.92565
MRAA PCA	Delta	Old Leaf	PC2 Axis	0.0554664	0.0544121	0.932845	0.0132932	0.534099	0.326908
MRAA PCA	Stress	Stem	PC1 Axis	0.583881	0.0155675	0.00813683	0.72209	0.799556	0.589572
MRAA PCA	Stress	Stem	PC2 Axis	0.0271801	0.111111	0.434968	0.48473	0.750949	0.223685
MRAA PCA	Delta	Stem	PC1 Axis	0.102077	0.777519	0.741506	0.858479	0.850703	0.748228
MRAA PCA	Delta	Stem	PC2 Axis	0.055247	0.00699596	0.0272587	0.7977	0.958546	0.357345
MRAA PCA	Stress	Root	PC1 Axis	0.113348	0.0340301	0.779563	0.0805486	0.830755	0.145618
MRAA PCA	Stress	Root	PC2 Axis	0.417376	0.39601	0.934159	0.266523	0.428556	0.74445
MRAA PCA	Delta	Root	PC1 Axis	0.348012	0.0257264	0.994472	0.056974	0.726688	0.212674
MRAA PCA	Delta	Root	PC2 Axis	0.103743	0.197198	0.63936	0.949053	0.918822	0.804094
