# Supplementary material
Source: MDPI journal article supplement (https://www.mdpi.com/2073-4395/10/7/1013)
Supplement: s1 [file s1 › Table S4.xlsx]

## Sheet: Sheet1
Element	Measurement	Tissue	Control Cultivated Mean	Control Wild Mean	Stress Cultivated Mean	Stress Wild Mean	Treatment pvalue	Domestication pvalue	TxD pvalue
B	Elemental Content (PPM)	Young Leaf	72.2	66.9	77.2	65.4	0.0264	0.0037	> 0.001
B	Elemental Content (PPM)	Old Leaf	98.6	104.3	109.2	95.8	0.4999	0.5248	> 0.001
B	Elemental Content (PPM)	Stem	28.6	25.1	30.7	29.3	> 0.001	0.0005	> 0.001
B	Elemental Content (PPM)	Root	29.8	28.4	30.3	27.3	0.4836	0.1008	0.0617
B	MRAA	Young Leaf	0.195536	0.103209	0.203849	0.0481047	0.2	0.0012	0.0824
B	MRAA	Old Leaf	0.639318	0.736072	0.68675	0.59272	0.0086	0.9778	> 0.001
B	MRAA	Stem	-1.13843	-1.30802	-1.12013	-1.10004	> 0.001	0.2243	> 0.001
B	MRAA	Root	-1.10898	-1.12778	-1.15104	-1.20656	0.0207	0.6691	0.4822
Ca	Elemental Content (%)	Young Leaf	1.169	1.22	1.239	1.134	0.4907	0.6373	> 0.001
Ca	Elemental Content (%)	Old Leaf	1.454	1.659	1.687	1.555	0.0156	0.6687	> 0.001
Ca	Elemental Content (%)	Stem	0.697	0.79	0.566	0.674	> 0.001	0.0019	0.417
Ca	Elemental Content (%)	Root	0.453	0.482	0.512	0.483	> 0.001	1	> 0.001
Ca	MRAA	Young Leaf	0.160219	0.0811274	0.187755	0.0463183	0.8388	0.0762	0.0812
Ca	MRAA	Old Leaf	0.466776	0.519627	0.627256	0.498126	> 0.001	0.1867	> 0.001
Ca	MRAA	Stem	-0.572963	-0.557053	-0.943321	-0.709979	> 0.001	0.1463	> 0.001
Ca	MRAA	Root	-1.19863	-1.25766	-1.08817	-1.18535	0.002	0.2712	0.5188
Cu	Elemental Content (PPM)	Young Leaf	24.3	19.2	25.1	21	> 0.001	0	0.07
Cu	Elemental Content (PPM)	Old Leaf	21.9	15.9	24.8	20.9	> 0.001	0.0003	> 0.001
Cu	Elemental Content (PPM)	Stem	15.8	13.2	17	18.5	> 0.001	0.6822	> 0.001
Cu	Elemental Content (PPM)	Root	92.8	84.7	56.7	69.6	> 0.001	0.6697	> 0.001
Cu	MRAA	Young Leaf	-0.230676	-0.266659	-0.198155	-0.434384	0.0096	0.0754	> 0.001
Cu	MRAA	Old Leaf	-0.39237	-0.533166	-0.237095	-0.439974	> 0.001	0.005	0.204
Cu	MRAA	Stem	-0.874702	-0.809373	-0.811132	-0.627752	> 0.001	0.1953	0.1048
Cu	MRAA	Root	1.66216	1.84491	0.949975	1.27585	> 0.001	0.0001	0.0246
Fe	Elemental Content (PPM)	Young Leaf	115.4	115	171	99.4	0.0125	0.0633	> 0.001
Fe	Elemental Content (PPM)	Old Leaf	177.4	203	324.6	318.3	> 0.001	0.8515	0.2919
Fe	Elemental Content (PPM)	Stem	63.2	80.9	138.2	159.3	> 0.001	0.3195	0.8158
Fe	Elemental Content (PPM)	Root	908.909	1034.7	857.7	1230	0.0606	0.0057	0.0013
Fe	MRAA	Young Leaf	-0.942591	-1.03481	-1.23188	-1.91217	> 0.001	0.012	> 0.001
Fe	MRAA	Old Leaf	-0.35044	-0.316976	-0.234923	-0.518327	0.4871	0.4335	0.0103
Fe	MRAA	Stem	-1.83148	-1.60482	-1.48317	-1.39448	0.0002	0.4024	0.3621
Fe	MRAA	Root	2.00256	2.06623	1.28646	1.67715	> 0.001	0.063	> 0.001
K	Elemental Content (%)	Young Leaf	4.371	4.585	4.334	4.089	> 0.001	0.8758	> 0.001
K	Elemental Content (%)	Old Leaf	7.429	6.75	5.658	4.797	> 0.001	0.0021	0.1546
K	Elemental Content (%)	Stem	9.407	10.804	4.52	4.183	> 0.001	0.0897	> 0.001
K	Elemental Content (%)	Root	4.231	5.049	2.394	2.71	> 0.001	0.0489	> 0.001
K	MRAA	Young Leaf	-0.733105	-0.739056	-0.0314348	-0.0047234	> 0.001	0.811	0.174
K	MRAA	Old Leaf	0.0306734	-0.182564	0.341507	0.213462	> 0.001	> 0.001	> 0.001
K	MRAA	Stem	0.367422	0.495721	-0.0253021	0.00248115	> 0.001	0.1571	0.0337
K	MRAA	Root	-0.822068	-0.603797	-0.921044	-0.603617	0.0023	0.0105	0.0022
Mg	Elemental Content (%)	Young Leaf	0.369	0.33	0.383	0.309	0.2273	> 0.001	> 0.001
Mg	Elemental Content (%)	Old Leaf	0.401	0.371	0.477	0.384	> 0.001	0.0104	> 0.001
Mg	Elemental Content (%)	Stem	0.337	0.261	0.249	0.252	> 0.001	0.0195	> 0.001
Mg	Elemental Content (%)	Root	0.227	0.156	0.17	0.179	> 0.001	0.0076	> 0.001
Mg	MRAA	Young Leaf	0.0530859	0.130658	0.156246	0.0160589	0.6933	0.5779	> 0.001
Mg	MRAA	Old Leaf	0.155882	0.291572	0.466	0.321912	> 0.001	0.9005	> 0.001
Mg	MRAA	Stem	-0.0922464	-0.221035	-0.469188	-0.280932	> 0.001	0.7362	> 0.001
Mg	MRAA	Root	-0.710145	-0.959005	-1.01479	-0.777336	0.0803	0.9392	> 0.001
Mn	Elemental Content (PPM)	Young Leaf	1229	937.7	1490.5	1115.8	> 0.001	0.0017	0.0284
Mn	Elemental Content (PPM)	Old Leaf	1404.4	1216.6	2046.6	1594.9	> 0.001	0.077	0.0018
Mn	Elemental Content (PPM)	Stem	712.4	534.3	739.9	750.1	> 0.001	0.0727	> 0.001
Mn	Elemental Content (PPM)	Root	5872	4446	6905	5796	> 0.001	> 0.001	0.2128
Mn	MRAA	Young Leaf	0.215845	0.138395	0.154315	-0.0287502	> 0.001	0.029	0.0234
Mn	MRAA	Old Leaf	0.409448	0.501406	0.570925	0.464163	> 0.001	0.8585	> 0.001
Mn	MRAA	Stem	-0.568885	-0.649509	-0.82838	-0.607161	> 0.001	0.4818	> 0.001
Mn	MRAA	Root	-0.846514	-0.917048	-0.935897	-0.966535	0.0941	0.6055	0.6305
N	Elemental Content (%)	Young Leaf	6.502	6.617	5.422	5.634	> 0.001	0.1218	0.1611
N	Elemental Content (%)	Old Leaf	6.416	6.2	4.735	4.667	> 0.001	0.1793	0.0474
N	Elemental Content (%)	Stem	4.448	5.239	3.137	3.208	> 0.001	0.0111	> 0.001
N	Elemental Content (%)	Root	3.369	3.689	3.106	3.337	> 0.001	0.0224	0.2789
N	MRAA	Young Leaf	0.273474	0.228658	0.378085	0.366871	> 0.001	0.2949	0.0638
N	MRAA	Old Leaf	0.254018	0.135133	0.182996	0.0913078	> 0.001	> 0.001	0.0752
N	MRAA	Stem	-0.2825	-0.114509	-0.421406	-0.451663	> 0.001	0.1088	> 0.001
N	MRAA	Root	-0.692495	-0.618556	-0.425657	-0.389896	> 0.001	0.1575	0.1601
Na	Elemental Content (%)	Young Leaf	0.0098	0.0113	0.6882	0.8939	> 0.001	0.1567	> 0.001
Na	Elemental Content (%)	Old Leaf	0.0103	0.016	1.6056	1.7056	> 0.001	0.644	0.2741
Na	Elemental Content (%)	Stem	0.0605	0.076	3.6925	3.3042	> 0.001	0.0606	> 0.001
Na	Elemental Content (%)	Root	0.6472	0.3957	3.0121	2.5241	> 0.001	> 0.001	> 0.001
Na	MRAA	Young Leaf	-4.08167	-2.83441	-1.82077	-1.21204	> 0.001	> 0.001	> 0.001
Na	MRAA	Old Leaf	-3.31913	-2.38074	-0.523368	-0.246834	> 0.001	> 0.001	> 0.001
Na	MRAA	Stem	-0.805114	-0.0409981	0.761823	0.744959	> 0.001	> 0.001	> 0.001
Na	MRAA	Root	2.64248	2.3126	0.462658	0.368933	> 0.001	0.0118	> 0.001
P	Elemental Content (%)	Young Leaf	0.684	0.723	0.444	0.464	> 0.001	0.1241	0.0495
P	Elemental Content (%)	Old Leaf	0.355	0.427	0.226	0.257	> 0.001	0.0171	> 0.001
P	Elemental Content (%)	Stem	0.262	0.357	0.226	0.272	> 0.001	> 0.001	> 0.001
P	Elemental Content (%)	Root	0.684	0.723	0.444	0.464	> 0.001	> 0.001	> 0.001
P	MRAA	Young Leaf	0.940157	0.711788	0.618535	0.52219	> 0.001	> 0.001	> 0.001
P	MRAA	Old Leaf	-0.0366586	-0.0618174	-0.365583	-0.336963	> 0.001	0.9718	0.0735
P	MRAA	Stem	-0.464926	-0.317595	-0.367767	-0.250899	> 0.001	0.0039	0.3939
P	MRAA	Root	-0.182919	-0.164105	0.112501	0.0541579	> 0.001	0.7214	0.0257
S	Elemental Content (%)	Young Leaf	0.544	0.58	0.418	0.465	> 0.001	0.0439	0.0672
S	Elemental Content (%)	Old Leaf	0.605	0.593	0.467	0.476	> 0.001	0.9553	0.0392
S	Elemental Content (%)	Stem	0.219	0.228	0.234	0.188	> 0.001	0.3647	> 0.001
S	Elemental Content (%)	Root	0.533	0.409	0.461	0.417	> 0.001	> 0.001	> 0.001
S	MRAA	Young Leaf	0.252914	0.397288	0.0768502	0.201866	> 0.001	0.0105	0.5125
S	MRAA	Old Leaf	0.407047	0.418686	0.234179	0.232526	> 0.001	0.8749	0.5588
S	MRAA	Stem	-1.09146	-0.989789	-0.78036	-1.11844	> 0.001	0.1623	> 0.001
S	MRAA	Root	0.201561	-0.113034	0.208971	0.0435954	0.0015	0.0046	0.0038
Zn	Elemental Content (PPM)	Young Leaf	85.5	70.6	106.3	82.9	> 0.001	> 0.001	0.0027
Zn	Elemental Content (PPM)	Old Leaf	115.3	82	147.6	113.5	> 0.001	0.0064	0.8493
Zn	Elemental Content (PPM)	Stem	185.8	155.1	243.9	176.6	> 0.001	0.0037	> 0.001
Zn	Elemental Content (PPM)	Root	357.2	452.9	232.1	470.3	0.0128	0.0063	0.001
Zn	MRAA	Young Leaf	-0.928211	-1.04938	-0.731099	-1.07608	0.0045	0.0145	> 0.001
Zn	MRAA	Old Leaf	-0.538115	-0.842728	-0.300891	-0.649826	> 0.001	0.0038	0.5617
Zn	MRAA	Stem	0.187175	0.0871886	0.430821	-0.0157335	0.0132	0.0061	> 0.001
Zn	MRAA	Root	0.99619	1.4809	0.368478	1.21639	> 0.001	> 0.001	> 0.001
