# Supplementary material
Source: MDPI journal article supplement (https://www.mdpi.com/2073-4395/10/7/1013)

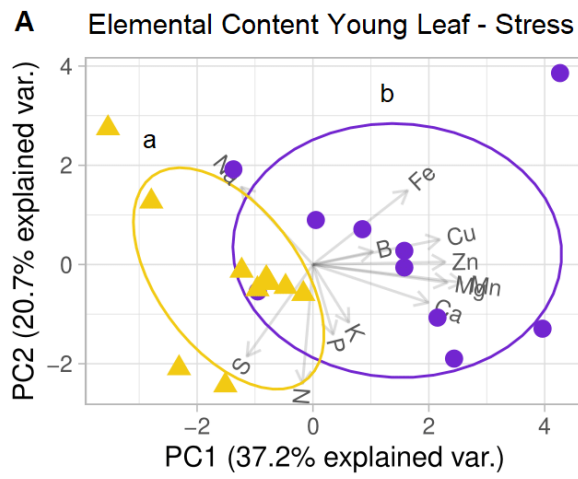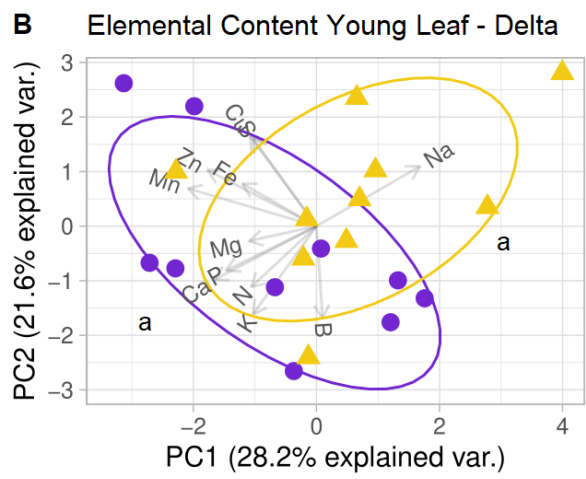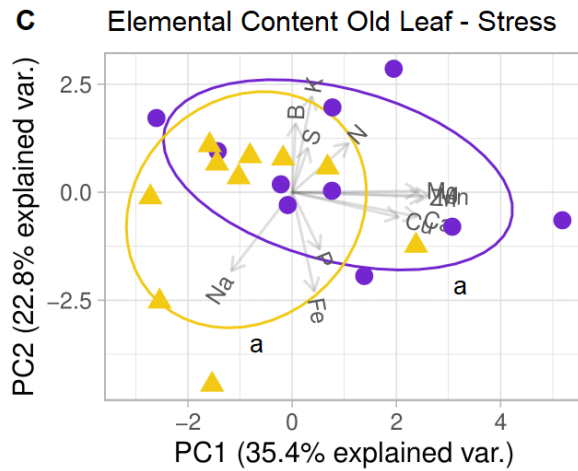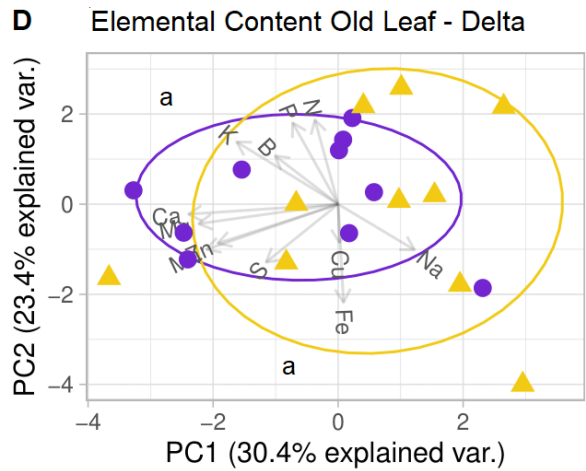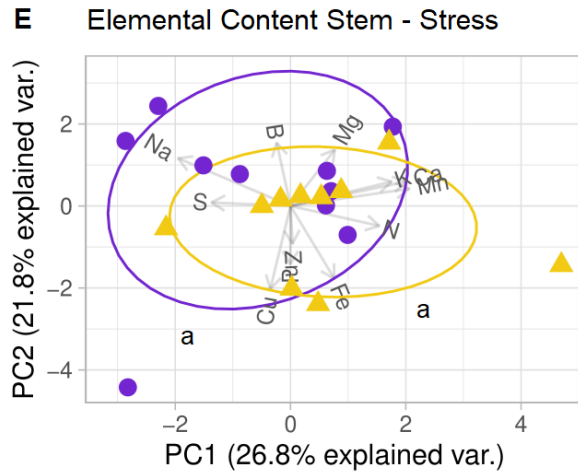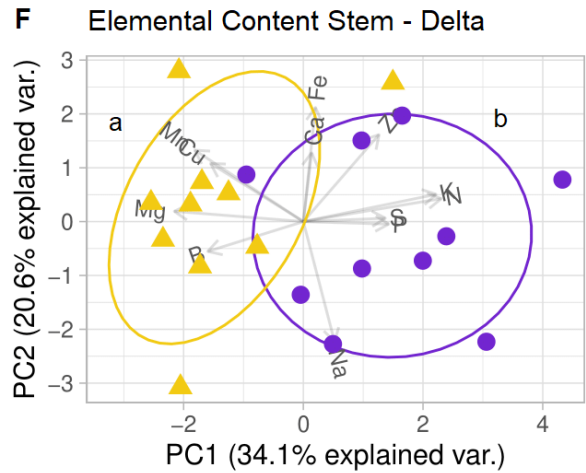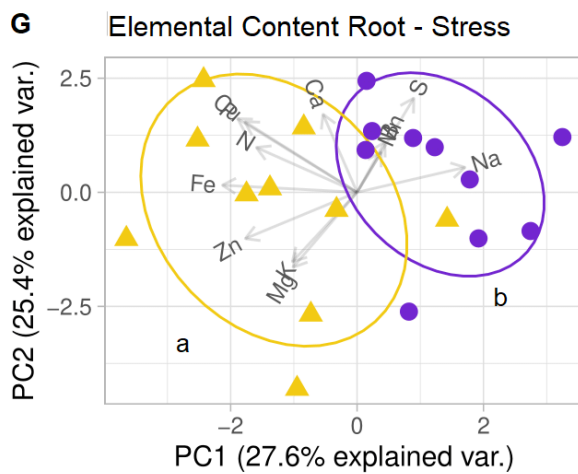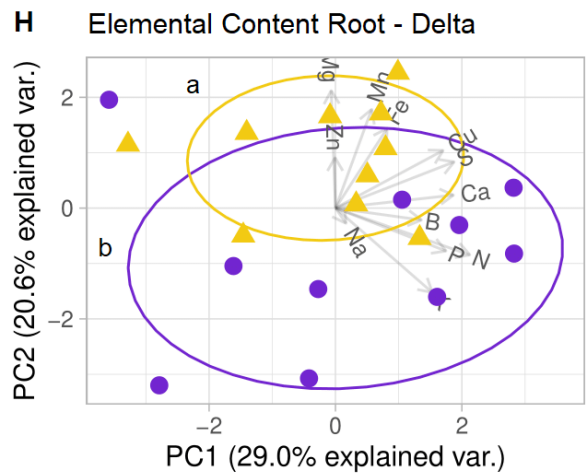

Supplement: s1 [file s1 › Figure S1.pdf]

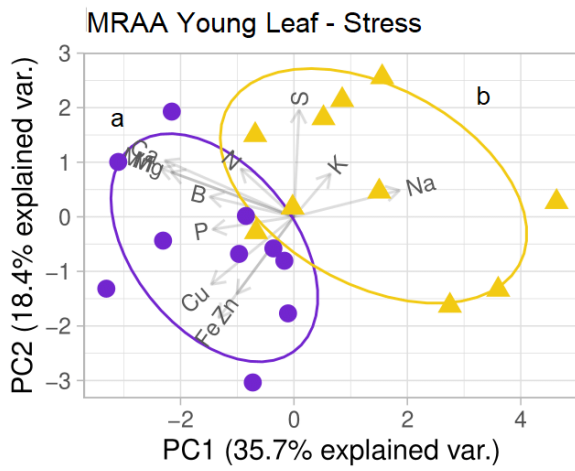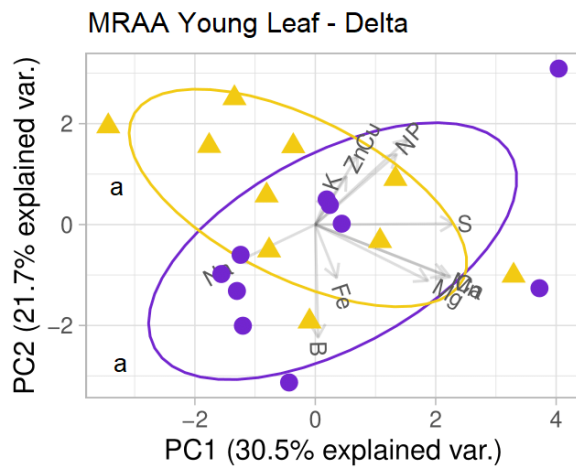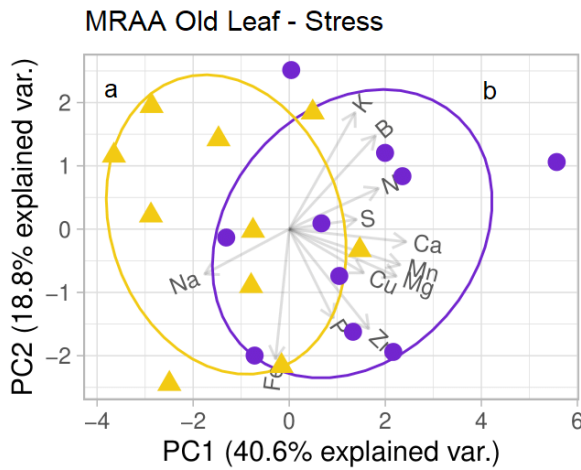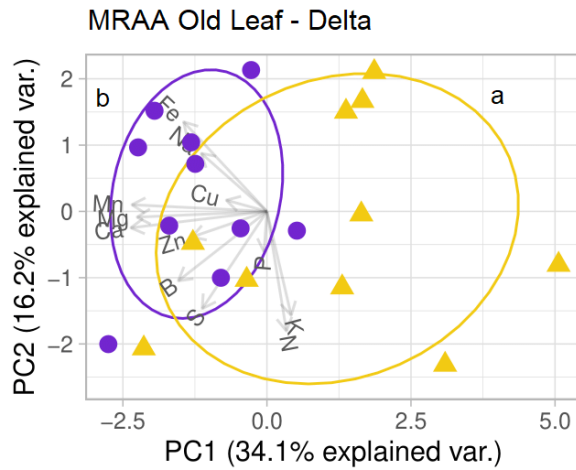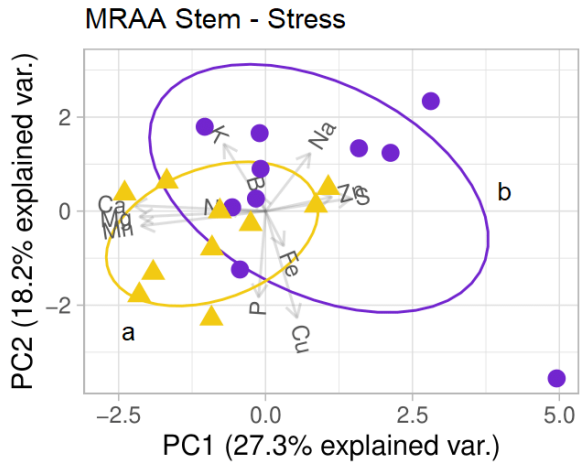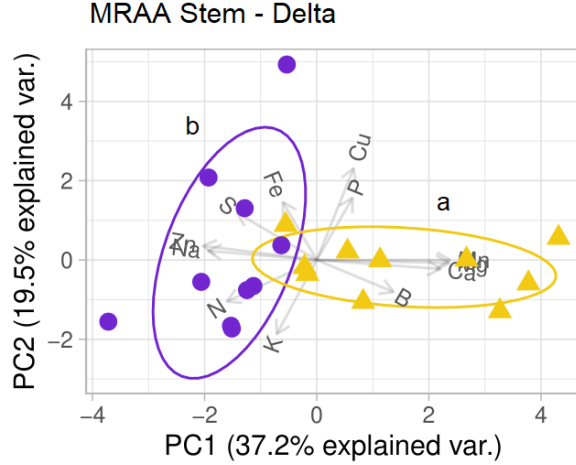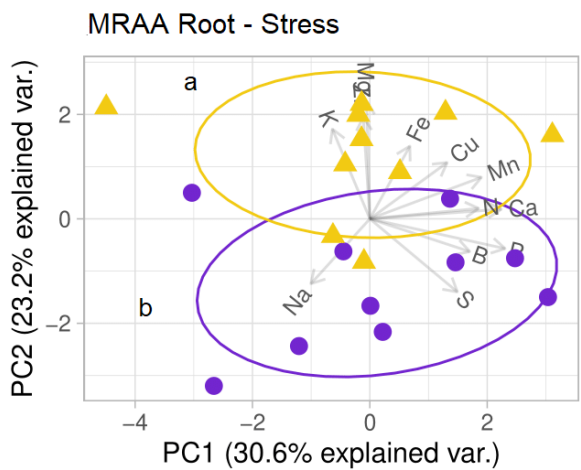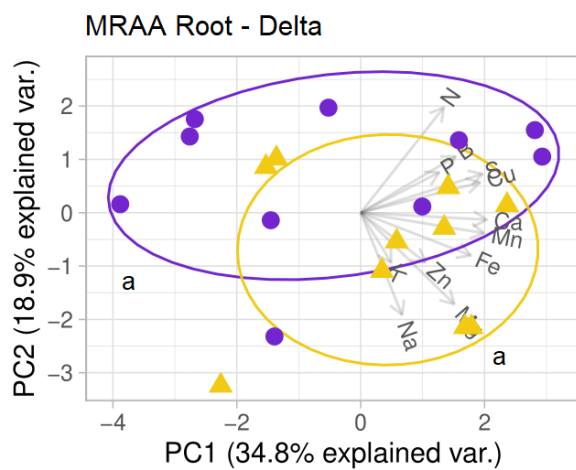

Supplement: s1 [file s1 › Figure S2.pdf]

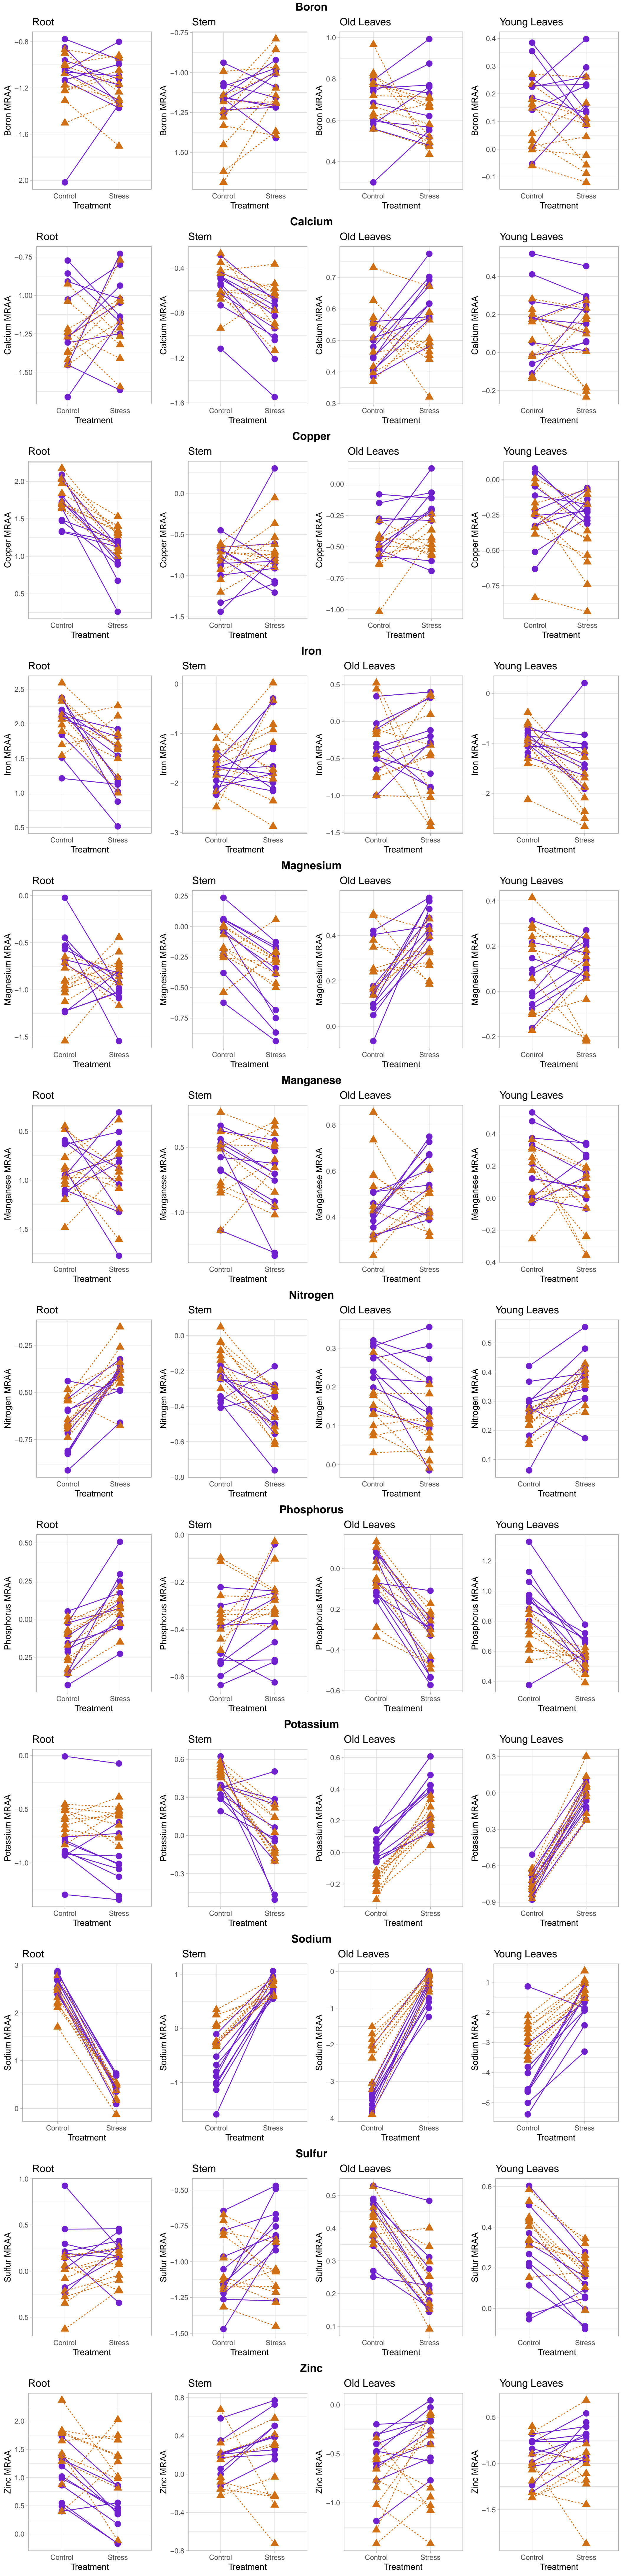

Supplement: s1 [file s1 › Figure S5.pdf]
